# Supplementary material
Source: PubMed Central journal article supplement (PMC8086759)

**Supplementary Table 1:** Assignment of cardiac lesions from entire cohort**Complex cardiac lesion – Acyanotic**

## AV canal defects

- Complete balanced AV canal defect, ASD, VSD status post repair
- Slight R-sided prominent AV canal
- AV canal

## Arch hypoplasia / stenosis

- Aortic stenosis / Shones Complex
- Aortic coarctation with aortic arch hypoplasia, moderate valvar aortic stenosis
- Arch hypoplasia, coarctation
- Critical coarctation of the aorta with acute cardiogenic shock (also with VSD, mitral valve stenosis)

## Pulmonary atresia / stenosis and variants

- Pulmonary atresia, intact ventricular septum, and RV-dependent coronary circulation
- Pulmonary atresia, hypoplastic right ventricle, intact ventricular septum
- Pulmonary vein stenosis
- Right-sided congenital diaphragmatic hernia, as well as situs inversus totalis

## Other

- Large inlet muscular VSD with outlet extension with bidirectional shunt, moderate dilatation of the right ventricle, moderate-size PDA with bidirectional shunt, aortic isthmus hypoplasia with no discrete coarctation, mild to moderate tricuspid valve regurgitation and cleft mitral valve without regurgitation

**Complex cardiac lesion - Cyanotic**

## Transposition of the great arteries and variants

- D-TGA
- DORV, TGA with intact septum
- TGA with intact ventricular septum
- Tricuspid atresia, D-transposition of the great arteries and arch hypoplasia

## Unbalanced AV Canal Defects

- Unbalanced right-dominant AV canal
- Unbalanced left-dominant AV canal, double-outlet right ventricle with d-malposed great arteries, severe pulmonary stenosis, restrictive outlet VSD, as well as severe left av valve regurgitation

## HLHS and variants

- HLHS status post Norwood (n=2)
- Hypoplastic left heart syndrome (mitral and aortic atresia), anomalous origin of the right subclavian artery, anomalous origin of the right coronary artery from the pulmonary artery.
- Hypoplastic left heart syndrome, intact atrial septum
- HLHS (3)
- Hypoplastic left heart syndrome with tricuspid valve regurgitation
- HLHS status post stage I palliation, status post GLENN
- HLHS status post VAD and heart transplant
- Hypoplastic left heart variant with mitral and aortic valve stenosis and arch hypoplasia
- Hypoplastic left heart syndrome with mitral stenosis and aortic atresia with intramyocardial sinusoids in the left lateral wall
- Hypoplastic left heart syndrome and situs inversus totalis, mitral atresia, and aortic atresia

## Complex single ventricle ventricle anatomy

- Dextrocardia double outlet right ventricle, pulmonary atresia, situs inversus totalis who has pulmonary ductal dependency
- Complex single ventricle cardiac anomaly consisting of tricuspid and pulmonary atresia with intact ventricular septum

- Large VSD with small left sided structures - moderate hypoplasia of the mitral valve and mild hypoplasia of the LV and ascending aorta
- Heterotaxy, double inlet left and double outlet right with single ventricle physiology
- Double inlet left ventricle and transported great vessels and aortic arch hypoplasia

Tetralogy of Fallot and variants

- Tetralogy of Fallot and pulmonary atresia with multiple aortopulmonary collaterals
- Tetralogy of Fallot, pulmonary atresia
- TOF, complete AV canal

Truncus arteriosus variants

- Truncus arteriosus, mitral atresia
- Truncus arteriosus status post truncal valvuloplasty, left-sided BT

Other complex cyanotic lesions

- TAPVR
- Heterotaxy, dextrocardia, ventricular inversion, right-dominant common AV canal, pulmonary atresia, obstructed infradiaphragmatic total anomalous pulmonary venous return.
- Double outlet right ventricle with subaortic VSD, normally related great vessels, hypoplastic Pulmonary outflow tract (TOF type), mitral-aortic discontinuity, a large outlet VSD (mostly right-to-left flow) and overriding aorta, hypoplastic pulmonary valve with antegrade blood flow
- Tricuspid Atresia (ductal dependent)
- Shunt, central PA reconstruction at OSH

**Supplementary Table 2:** Imaging coding as Mild vs. Moderate to Severe in infants with EEG during ECMO course

| Mild                                                                                                                                                                                                                                                                                                                                                                                                                                                                                                                                                                                                                                                                                           | Moderate to Severe                                                                                                                                                                                                                                                                                                                                                                                                                                                                                                                                                                                                                                                                                                                                  |
|------------------------------------------------------------------------------------------------------------------------------------------------------------------------------------------------------------------------------------------------------------------------------------------------------------------------------------------------------------------------------------------------------------------------------------------------------------------------------------------------------------------------------------------------------------------------------------------------------------------------------------------------------------------------------------------------|-----------------------------------------------------------------------------------------------------------------------------------------------------------------------------------------------------------------------------------------------------------------------------------------------------------------------------------------------------------------------------------------------------------------------------------------------------------------------------------------------------------------------------------------------------------------------------------------------------------------------------------------------------------------------------------------------------------------------------------------------------|
| <ul style="list-style-type: none"> <li>• Expansion of the subarachnoid or extra-axial spaces</li> <li>• Simple subgaleal hematoma</li> <li>• Lenticulostriate vasculopathy</li> <li>• Mild white matter injury (single focus)</li> <li>• Single punctate hemorrhage</li> <li>• Single or mild T1/T2 changes without diffusion changes</li> <li>• Low grade intraventricular hemorrhage (including subependymal hemorrhage)</li> <li>• Mild delay of brain development (based on myelination and/or sulcation pattern)</li> <li>• Mild ventriculomegaly</li> <li>• Expected vascular changes associated with ligation of vessels after decannulation</li> <li>• Few microhemorrhages</li> </ul> | <ul style="list-style-type: none"> <li>• Diffuse cerebral edema</li> <li>• Intraparenchymal hemorrhage</li> <li>• Infarction (including subacute)</li> <li>• Deep white matter injury (including thalamic injury)</li> <li>• Subdural hematoma</li> <li>• Ventriculomegaly requiring shunt placement</li> <li>• Encephalomalacia</li> <li>• Global atrophy</li> <li>• Diffuse white matter injury</li> <li>• Midline shift</li> <li>• Dural Sinus Thrombosis</li> <li>• Moderate dilation of ventricles</li> <li>• Syndromic abnormality of the brain + other acute findings (periventricular leukomalacia, ventriculomegaly)</li> <li>• Diffuse asymmetric echogenicity consistent with infarction on HUS</li> <li>• &gt;1 mild finding</li> </ul> |

**Supplementary Table 3:** Non congenital heart disease cardiac and pulmonary reasons for ECMO

| Cardiac                                                                 | Pulmonary                                                                                                                                                           |
|-------------------------------------------------------------------------|---------------------------------------------------------------------------------------------------------------------------------------------------------------------|
| Arrhythmia<br>Coronary arterial clot<br>Cardiomyopathy<br>Heart failure | Interstitial lung disease complicated by pulmonary hypertension<br>Respiratory distress / failure<br>Congenital pulmonary airway malformation status post lobectomy |

**Supplementary Figure 1:** Number of infants initiated onto EMCO by year, highlighting those with EEG and electrographic seizure and those with EEG without electrographic seizure.

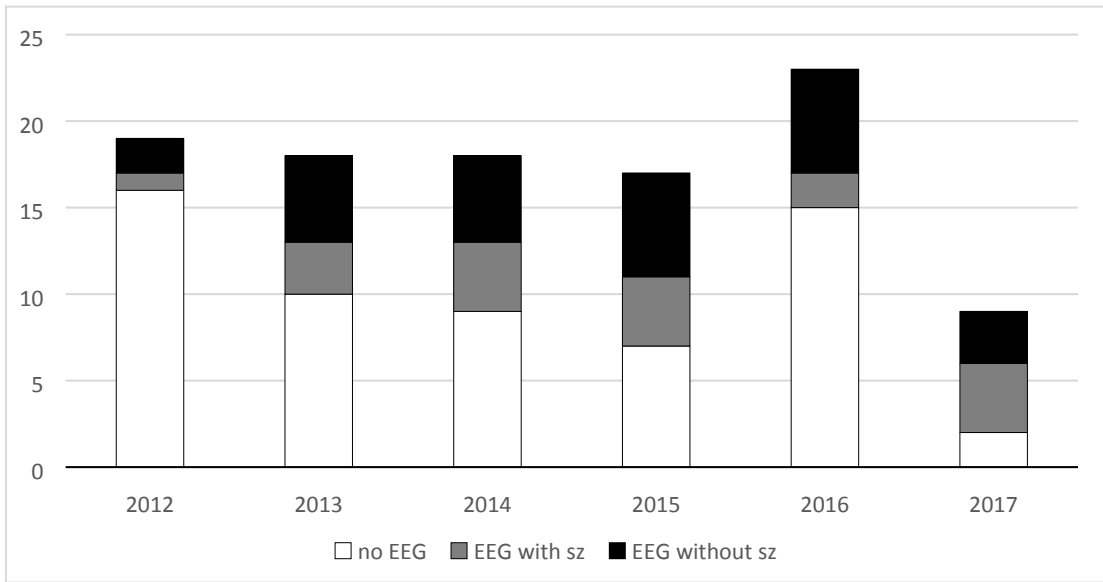

Supplement: NIHMS1633637-supplement-1.pdf [file NIHMS1633637-supplement-1.pdf]
